# Supplementary material for: An updated systematic review and dose-response meta-analysis of the randomized controlled trials on the effects of alpha-lipoic acid supplementation on inflammatory biomarkers
Source: Atypon-hosted journal article supplement (doi:10.1024/0300-9831/a000702), 2021-04-08
Supplement: 0300-9831_a000702_esm1.pdf [file 0300-9831_a000702_esm1.pdf]

**Title: An updated systematic review and dose-response meta-analysis of the effects of Alpha-Lipoic acid supplementation on inflammatory biomarkers**

**Authors:** Mahdi Vajdi <sup>1</sup>, Mahsa Mahmoudi-Nezhad <sup>1</sup>, Mahdiah Abbasalizad Farhangi <sup>\*2</sup>

<sup>1</sup> Student Research Committee, Tabriz University of Medical Sciences, Tabriz, Iran.

<sup>2</sup> Department of Community Nutrition, Tabriz University of Medical Sciences, Tabriz, Iran.

## **Electronic Supplementary Material**

<https://doi.org/10.1024/0300-9831/a000702>

**Table E1.** PRISMA Checklist [1]

| Section/topic             | #  | Checklist item                                                                                                                                                                                                                                                                                              | Reported on page #                       |
|---------------------------|----|-------------------------------------------------------------------------------------------------------------------------------------------------------------------------------------------------------------------------------------------------------------------------------------------------------------|------------------------------------------|
| <b>TITLE</b>              |    |                                                                                                                                                                                                                                                                                                             |                                          |
| Title                     | 1  | Identify the report as a systematic review, meta-analysis, or both.                                                                                                                                                                                                                                         | Page 1; line 1-3                         |
| <b>ABSTRACT</b>           |    |                                                                                                                                                                                                                                                                                                             |                                          |
| Structured summary        | 2  | Provide a structured summary including, as applicable: background; objectives; data sources; study eligibility criteria, participants, and interventions; study appraisal and synthesis methods; results; limitations; conclusions and implications of key findings; systematic review registration number. | Page 2; lines 1-28                       |
| <b>INTRODUCTION</b>       |    |                                                                                                                                                                                                                                                                                                             |                                          |
| Rationale                 | 3  | Describe the rationale for the review in the context of what is already known.                                                                                                                                                                                                                              | Page 3                                   |
| Objectives                | 4  | Provide an explicit statement of questions being addressed with reference to participants, interventions, comparisons, outcomes, and study design (PICOS).                                                                                                                                                  | Page 4; lines 6-14                       |
| <b>METHODS</b>            |    |                                                                                                                                                                                                                                                                                                             |                                          |
| Protocol and registration | 5  | Indicate if a review protocol exists, if and where it can be accessed (e.g., Web address), and, if available, provide registration information including registration number.                                                                                                                               | Page 4 lines 17-19                       |
| Eligibility criteria      | 6  | Specify study characteristics (e.g., PICOS, length of follow-up) and report characteristics (e.g., years considered, language, publication status) used as criteria for eligibility, giving rationale.                                                                                                      | Page 5; lines 5-20                       |
| Information sources       | 7  | Describe all information sources (e.g., databases with dates of coverage, contact with study authors to identify additional studies) in the search and date last searched.                                                                                                                                  | Page 4, line 17-28                       |
| Search                    | 8  | Present full electronic search strategy for at least one database, including any limits used, such that it could be repeated.                                                                                                                                                                               | Page 4, line 17-28                       |
| Study selection           | 9  | State the process for selecting studies (i.e., screening, eligibility, included in systematic review, and, if applicable, included in the meta-analysis).                                                                                                                                                   | Page 5; lines 5-20                       |
| Data collection process   | 10 | Describe method of data extraction from reports (e.g., piloted forms, independently, in duplicate) and any processes for obtaining and confirming data from investigators.                                                                                                                                  | Page 5; lines 21-28<br>Page 6; lines 1-8 |

Electronic Supplementary Material 1, <https://doi.org/10.1024/0300-9831/a000702>

|                                    |    |                                                                                                                                                                                                                        |                                     |
|------------------------------------|----|------------------------------------------------------------------------------------------------------------------------------------------------------------------------------------------------------------------------|-------------------------------------|
| Data items                         | 11 | List and define all variables for which data were sought (e.g., PICOS, funding sources) and any assumptions and simplifications made.                                                                                  | Page 5; lines 1-5                   |
| Risk of bias in individual studies | 12 | Describe methods used for assessing risk of bias of individual studies (including specification of whether this was done at the study or outcome level), and how this information is to be used in any data synthesis. | Page 10- lines 1-11                 |
| Summary measures                   | 13 | State the principal summary measures (e.g., risk ratio, difference in means).                                                                                                                                          | Page 6; lines 17-28                 |
| Synthesis of results               | 14 | Describe the methods of handling data and combining results of studies, if done, including measures of consistency (e.g., $I^2$ ) for each meta-analysis.                                                              | Page 6; lines 10-28                 |
| Risk of bias across studies        | 15 | Specify any assessment of risk of bias that may affect the cumulative evidence (e.g., publication bias, selective reporting within studies).                                                                           | Page 10- lines 1-11                 |
| Additional analyses                | 16 | Describe methods of additional analyses (e.g., sensitivity or subgroup analyses, meta-regression), if done, indicating which were pre-specified.                                                                       | Page 6; lines 10-28                 |
| <b>RESULTS</b>                     |    |                                                                                                                                                                                                                        |                                     |
| Study selection                    | 17 | Give numbers of studies screened, assessed for eligibility, and included in the review, with reasons for exclusions at each stage, ideally with a flow diagram.                                                        | Page 7, line 2-17                   |
| Study characteristics              | 18 | For each study, present characteristics for which data were extracted (e.g., study size, PICOS, follow-up period) and provide the citations.                                                                           | Page 7, lines 18-28<br>And Table 1  |
| Risk of bias within studies        | 19 | Present data on risk of bias of each study and, if available, any outcome level assessment (see item 12).                                                                                                              | Sup. Tables 3                       |
| Results of individual studies      | 20 | For all outcomes considered (benefits or harms), present, for each study: (a) simple summary data for each intervention group (b) effect estimates and confidence intervals, ideally with a forest plot.               | Figures 1-3<br>Page 8, 9            |
| Synthesis of results               | 21 | Present results of each meta-analysis done, including confidence intervals and measures of consistency.                                                                                                                | Figures 1-3                         |
| Risk of bias across studies        | 22 | Present results of any assessment of risk of bias across studies (see Item 15).                                                                                                                                        | Sup. Figure 1A, B, C                |
| Additional analysis                | 23 | Give results of additional analyses, if done (e.g., sensitivity or subgroup analyses, meta-regression [see Item 16]).                                                                                                  | Sup. Tables 4, 5                    |
| <b>DISCUSSION</b>                  |    |                                                                                                                                                                                                                        |                                     |
| Summary of evidence                | 24 | Summarize the main findings including the strength of evidence for each main outcome; consider their relevance to key groups (e.g., healthcare providers, users, and policy makers).                                   | Page 10; lines 13-19<br>Page 11, 12 |
| Limitations                        | 25 | Discuss limitations at study and outcome level (e.g., risk of bias), and at review-level (e.g., incomplete retrieval of identified research, reporting bias).                                                          | Page 12; lines 13-20.               |

Electronic Supplementary Material 1, <https://doi.org/10.1024/0300-9831/a000702>

|                |    |                                                                                                                                            |                     |
|----------------|----|--------------------------------------------------------------------------------------------------------------------------------------------|---------------------|
| Conclusions    | 26 | Provide a general interpretation of the results in the context of other evidence, and implications for future research.                    | Page 12, line 21-26 |
| <b>FUNDING</b> |    |                                                                                                                                            |                     |
| Funding        | 27 | Describe sources of funding for the systematic review and other support (e.g., supply of data); role of funders for the systematic review. | Page 12; line 28    |

**Table E2.** Search strategies and the number of records according to different electronic database

| Search strategy                                                                                                                                                                                                                                                                                                                                                                                                                                                             | Database | Num. of records |
|-----------------------------------------------------------------------------------------------------------------------------------------------------------------------------------------------------------------------------------------------------------------------------------------------------------------------------------------------------------------------------------------------------------------------------------------------------------------------------|----------|-----------------|
| Search (((((alpha lipoic acid[Title/Abstract]) OR $\alpha$ lipoic acid[Title/Abstract]))) AND (((((((inflammation [Title/Abstract]) OR inflammat* [Title/Abstract]) OR C reactive protein[Title/Abstract]) OR CRP[Title/Abstract]) OR interleukin 6[Title/Abstract]) OR IL-6[Title/Abstract]) OR interleukin*[Title/Abstract]) OR tumor necrosis factor $\alpha$ [Title/Abstract]) OR TNF $\alpha$ [Title/Abstract]) OR TNF- $\alpha$ [Title/Abstract]) Sort by: Best Match | PubMed   | 462             |
|                                                                                                                                                                                                                                                                                                                                                                                                                                                                             | Scopus   | 737             |
|                                                                                                                                                                                                                                                                                                                                                                                                                                                                             | ProQuest | 607             |
|                                                                                                                                                                                                                                                                                                                                                                                                                                                                             | Embase   | 482             |

**Table E3.** Quality of bias assessment of the included studies according to the Cochrane guidelines.

| Author name, year of publication, references | Random sequence generation | Allocation concealment | Blinding of participants and personnel | Blinding of outcome assessment | Incomplete outcome data | Selective reporting | Overall quality |
|----------------------------------------------|----------------------------|------------------------|----------------------------------------|--------------------------------|-------------------------|---------------------|-----------------|
| Mendoza-Núñez VM; 2019 [2]                   | H                          | L                      | H                                      | U                              | H                       | L                   | Fair            |
| Sardu C; 2017 [3]                            | L                          | L                      | L                                      | U                              | U                       | L                   | Good            |
| Hong Y; 2017 [4]                             | L                          | L                      | L                                      | U                              | U                       | L                   | Good            |
| Atmaca HU; 2017[5]                           | L                          | H                      | H                                      | U                              | U                       | H                   | Weak            |
| Marfella R; 2016 [6]                         | L                          | L                      | L                                      | H                              | U                       | H                   | Good            |
| Mohammadi V; 2017 [7]                        | L                          | L                      | L                                      | U                              | U                       | H                   | Good            |
| Mirtaheri E; 2015 [8]                        | L                          | L                      | L                                      | U                              | U                       | L                   | Good            |
| Huerta AE; 2015 [9]                          | L                          | L                      | L                                      | U                              | H                       | H                   | Good            |
| Dworacka M; 2015 [10]                        | L                          | H                      | H                                      | H                              | U                       | U                   | Weak            |
| Safa J; 2014 [11]                            | L                          | L                      | L                                      | H                              | U                       | L                   | Good            |
| Khalili M; 2014[12]                          | L                          | L                      | L                                      | H                              | U                       | U                   | Good            |
| Manning PJ; 2014[13]                         | L                          | L                      | L                                      | U                              | H                       | U                   | Good            |
| El-Nakib G; 2013 [14]                        | L                          | L                      | H                                      | H                              | U                       | H                   | Weak            |
| Ahmadi A; 2013 [15]                          | L                          | H                      | H                                      | U                              | H                       | U                   | Weak            |
| Mollo RZ; 2012[16]                           | L                          | L                      | L                                      | U                              | U                       | H                   | Good            |
| Khabbazi RZ; 2012 [17]                       | L                          | L                      | L                                      | L                              | U                       | L                   | Good            |
| Zhang Y; 2011 [18]                           | L                          | L                      | L                                      | U                              | L                       | L                   | Good            |
| Gianturko V; 2009 [19]                       | L                          | L                      | L                                      | U                              | H                       | U                   | Good            |
| Bae SC; 2009 [20]                            | L                          | L                      | L                                      | U                              | H                       | U                   | Good            |
| Xiang GD; 2008 [21]                          | L                          | L                      | L                                      | U                              | H                       | L                   | Good            |
| Vincent H; 2007 [22]                         | L                          | L                      | L                                      | U                              | H                       | L                   | Good            |
| Chang J; 2007 [23]                           | L                          | L                      | H                                      | U                              | H                       | H                   | Weak            |
| Alleva R; 2005 [24]                          | L                          | L                      | L                                      | U                              | H                       | L                   | Good            |

L, low risk of bias; H, high risk of bias; U, unclear risk of bias.

**Table E4.** Results of subgroup analyses for the effects of ALA on CRP concentrations according to intervention or participant characteristics.

| Group                        | No. of trial | WMD (95% CI)         | P      | P heterogeneity | I <sup>2</sup> , % | P for between study heterogeneity |
|------------------------------|--------------|----------------------|--------|-----------------|--------------------|-----------------------------------|
| <b>Total</b>                 | 16           | -0.692 -1.125 -0.258 | 0.002  | <0.001          | 83.2               |                                   |
| <b>Study duration, weeks</b> |              |                      |        |                 |                    | <0.001                            |
| < 10                         | 8            | -0.969 -1.715 -0.222 | 0.011  | 0.153           | 34.5               |                                   |
| 10-20                        | 4            | -0.894 -2.138 0.350  | 0.159  | 0.015           | 71.3               |                                   |
| ≥ 20                         | 4            | -0.411 -1.273 0.451  | 0.350  | <0.001          | 95.5               |                                   |
| <b>ALA dose, mg/day</b>      |              |                      |        |                 |                    | <0.001                            |
| > 600                        | 3            | -1.107 -2.196 -0.018 | 0.046  | 0.670           | 0                  |                                   |
| ≥ 600                        | 13           | -0.653 -1.115 -0.192 | 0.006  | <0.001          | 86.1               |                                   |
| <b>Baseline CRP mg/l</b>     |              |                      |        |                 |                    | <0.001                            |
| ≤ 2                          | 4            | 0.114 -0.296 0.523   | 0.586  | 0.242           | 28.3               |                                   |
| 2-4                          | 6            | -0.844 -1.295 -0.393 | <0.001 | <0.001          | 78.8               |                                   |
| ≥ 4                          | 6            | -1.585 -3.233 0.063  | 0.059  | 0.087           | 47.9               |                                   |
| <b>CRP type</b>              |              |                      |        |                 |                    | <0.001                            |
| CRP                          | 9            | -0.507 -1.019 0.004  | 0.052  | <0.001          | 88.5               |                                   |
| hs-CRP                       | 7            | -1.193 -2.177 -0.209 | 0.018  | 0.015           | 61.8               |                                   |
| <b>Health status</b>         |              |                      |        |                 |                    | <0.001                            |
| Apparently healthy/ obese    | 4            | -0.118 -0.645 0.410  | 0.661  | <0.001          | 85.6               |                                   |
| Diseased                     | 12           | -0.959 -1.344 -0.574 | <0.001 | 0.106           | 35.5               |                                   |
| <b>Sample size</b>           |              |                      |        |                 |                    | <0.001                            |
| < 40                         | 4            | -0.518 -1.083 0.048  | 0.073  | 0.504           | 0.0                |                                   |
| ≥ 40                         | 12           | -0.706 -1.209 -0.203 | 0.006  | <0.001          | 87.3               |                                   |
| <b>Region</b>                |              |                      |        |                 |                    | <0.001                            |
| USA/ Europe                  | 9            | -0.457 -0.926 0.013  | 0.057  | <0.001          | 88.4               |                                   |
| Asia                         | 7            | -1.492 -2.571 -0.412 | 0.007  | 0.076           | 47.6               |                                   |
| <b>Quality</b>               |              |                      |        |                 |                    | <0.001                            |
| Good                         | 13           | -0.592 -1.058 -0.127 | 0.013  | <0.001          | 85.4               |                                   |
| Weak                         | 3            | -1.233 -2.151 -0.315 | 0.008  | 0.325           | 11.1               |                                   |
| <b>Gender</b>                |              |                      |        |                 |                    | <0.001                            |
| Male                         | 2            | -9.384 -27.962 9.193 | 0.322  | 0.004           | 87.8               |                                   |
| Female                       | 2            | -1.103 -2.148 -0.059 | 0.038  | 0.621           | 0.0                |                                   |
| Both gender                  | 12           | -0.532 -0.980 -0.085 | 0.020  | <0.001          | 79.0               |                                   |

\* Note that the study by Manning PJ et al [13] was included as two independent studies.

**Table E5.** Results of subgroup analyses for the effects of ALA on IL-6 concentrations according to intervention or participant characteristics

| Group                        | No. of trial | WMD (95% CI)          | P     | P heterogeneity | I <sup>2</sup> , % | P for between study heterogeneity |
|------------------------------|--------------|-----------------------|-------|-----------------|--------------------|-----------------------------------|
| <b>Total</b>                 | 13           | -1.830 -2.902 -0.758  | 0.001 | <0.001          | 98.7               | -                                 |
| <b>Study duration, weeks</b> |              |                       |       |                 |                    | <0.001                            |
| < 10                         | 6            | -2.655 -4.394 -0.915  | 0.003 | <0.001          | 99.4               |                                   |
| 10-20                        | 4            | -10.012 -27.08 6.984  | 0.248 | <0.001          | 94.8               |                                   |
| ≥ 20                         | 3            | -0.183 -0.427 0.061   | 0.142 | 0.955           | 0.0                |                                   |
| <b>ALA dose, mg/day</b>      |              |                       |       |                 |                    | <0.001                            |
| 300                          | 2            | -0.774 -2.087 0.538   | 0.248 | 0.150           | 51.6               |                                   |
| 600                          | 9            | -1.526 -2.748 -0.304  | 0.014 | <0.001          | 99.0               |                                   |
| 1200                         | 2            | -24.627 -59.71 10.45  | 0.169 | <0.001          | 96.8               |                                   |
| <b>Baseline IL-6, pg/ml</b>  |              |                       |       |                 |                    | <0.001                            |
| ≤ 10                         | 9            | -1.431 -2.485 -0.378  | 0.008 | <0.001          | 99.1               |                                   |
| > 10                         | 4            | -15.56 -38.923 7.810  | 0.192 | <0.001          | 93.2               |                                   |
| <b>Health status</b>         |              |                       |       |                 |                    | <0.001                            |
| Apparently healthy / obese   | 4            | -0.395 -0.799 0.009   | 0.055 | 0.001           | 80.7               |                                   |
| Diseased                     | 9            | -1.830 -2.902 -0.758  | 0.001 | <0.001          | 99.7               |                                   |
| <b>Sample size</b>           |              |                       |       |                 |                    | <0.001                            |
| ≤ 40                         | 6            | -2.705 -6.152 0.743   | 0.124 | <0.001          | 99.3               |                                   |
| > 40                         | 7            | -0.438 -1.163 0.288   | 0.237 | <0.001          | 90.7               |                                   |
| <b>Region</b>                |              |                       |       |                 |                    | <0.001                            |
| USA/ Europe                  | 6            | -1.641 -3.479 0.196   | 0.080 | <0.001          | 99.4               |                                   |
| Asia                         | 7            | -6.739 -11.61 -1.870  | 0.007 | <0.001          | 91.4               |                                   |
| <b>Quality</b>               |              |                       |       |                 |                    | <0.001                            |
| Good                         | 10           | -2.487 -4.163 -0.811  | 0.004 | 0.024           | 98.9               |                                   |
| Fair                         | 1            | -0.180 -0.297 -0.063  | 0.003 | <0.001          | -                  |                                   |
| Weak                         | 2            | -9.563 -33.582 14.456 | 0.435 | <0.001          | 80.3               |                                   |
| <b>Gender</b>                |              |                       |       |                 |                    | <0.001                            |
| Male                         | 2            | -0.198 -0.592 0.197   | 0.325 | 0.760           | 0.0                |                                   |
| Female                       | 2            | -3.182 -8.573 2.210   | 0.247 | 0.077           | 68.0               |                                   |
| Both gender                  | 9            | -2.158 -3.505 -0.810  | 0.002 | <0.001          | 99.7               |                                   |

\* Note that the study by Manning PJ et al [13] was included as two independent studies.



**Table E6.** Results of subgroup analyses for the effects of ALA on TNF- $\alpha$  concentrations according to intervention or participant characteristics.

| Group                                           | No. of trial | WMD (95% CI)          | P     | P heterogeneity | I <sup>2</sup> , % | P for between study heterogeneity |
|-------------------------------------------------|--------------|-----------------------|-------|-----------------|--------------------|-----------------------------------|
| <b>Total</b>                                    | 10           | -0.446 -0.853 -0.039  | 0.032 | <0.001          | 94.9               |                                   |
| <b>Study duration, weeks</b>                    |              |                       |       |                 |                    | <0.001                            |
| ≤ 10                                            | 5            | -0.283 -0.846 0.280   | 0.325 | <0.001          | 80.8               |                                   |
| 10-20                                           | 5            | -0.819 -1.774 0.136   | 0.093 | <0.001          | 98.9               |                                   |
| <b>ALA dose, mg/day</b>                         |              |                       |       |                 |                    | <0.001                            |
| > 1000                                          | 8            | -0.469 -0.861 -0.077  | 0.019 | <0.001          | 95.2               |                                   |
| ≥ 1000                                          | 2            | -30.679 -93.33 31.978 | 0.339 | <0.001          | 96.7               |                                   |
| <b>Baseline TNF-<math>\alpha</math> (pg/ml)</b> |              |                       |       |                 |                    | 0.008                             |
| < 1                                             | 5            | -0.400 -0.810 0.010   | 0.056 | <0.001          | 97.0               |                                   |
| 1-3                                             | 2            | -1.091 -2.725 0.544   | 0.191 | 0.094           | 64.4               |                                   |
| ≥ 3                                             | 3            | -6.131 -14.89 2.629   | 0.170 | <0.001          | 93.8               |                                   |
| <b>Health status</b>                            |              |                       |       |                 |                    | <0.001                            |
| Apparently healthy obese                        | 3            | 0.101 -0.273 0.475    | 0.597 | <0.001          | 96.8               |                                   |
| Diseased                                        | 7            | -0.847 -1.963 0.268   | 0.137 | <0.001          | 88.2               |                                   |
| <b>Sample size</b>                              |              |                       |       |                 |                    | <0.001                            |
| ≤ 50                                            | 4            | -1.359 -2.995 0.276   | 0.103 | <0.001          | 92.4               |                                   |
| ≥ 50                                            | 6            | -0.025 -0.389 0.340   | 0.894 | <0.001          | 93.4               |                                   |
| <b>Region</b>                                   |              |                       |       |                 |                    | 0.003                             |
| USA/ Europe                                     | 5            | -0.425 -0.845 -0.005  | 0.047 | <0.001          | 96.5               |                                   |
| Asia                                            | 5            | -0.361 -2.468 1.746   | 0.737 | <0.001          | 89.3               |                                   |
| <b>Gender</b>                                   |              |                       |       |                 |                    | <0.001                            |
| Male/ Female                                    | 2            | -0.780 -2.809 1.248   | 0.451 | 0.009           | 85.5               |                                   |
| Both gender                                     | 8            | -0.376 -0.810 0.058   | 0.090 | <0.001          | 95.8               |                                   |

\* Note that the study by Manning PJ et al [13] was included as two independent studies. All of the studies had “Good” quality. therefore, subgrouping according to quality of study had not performed.

(A)

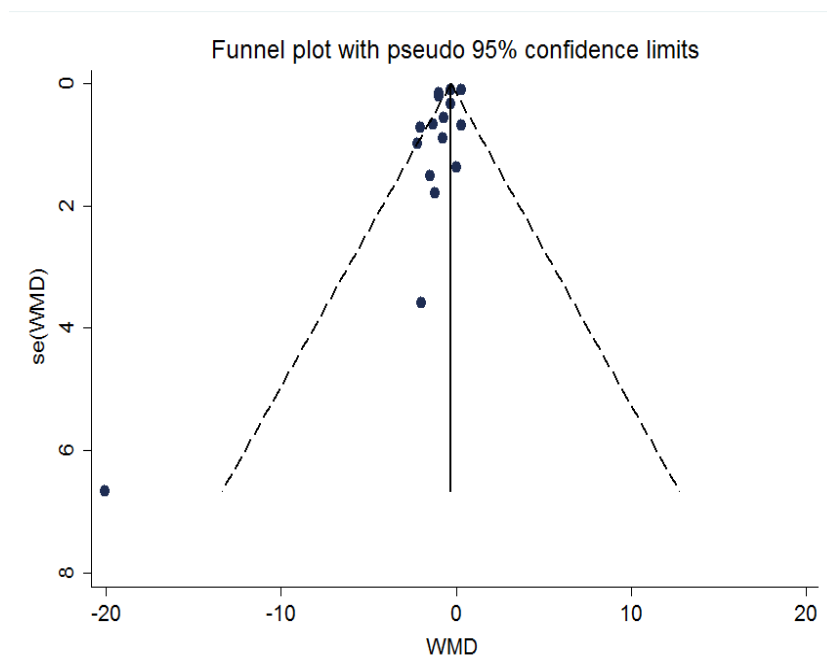

(B)

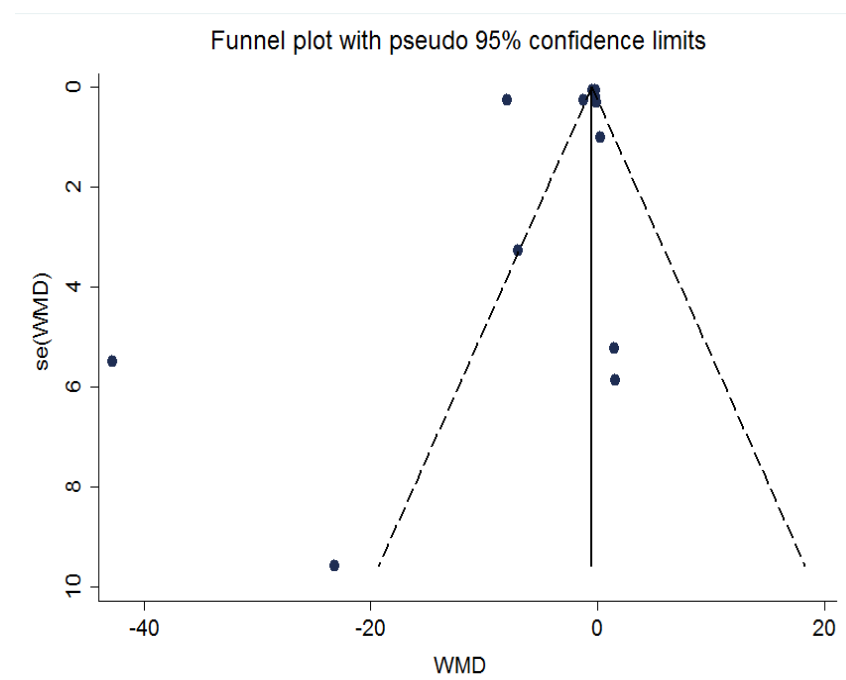

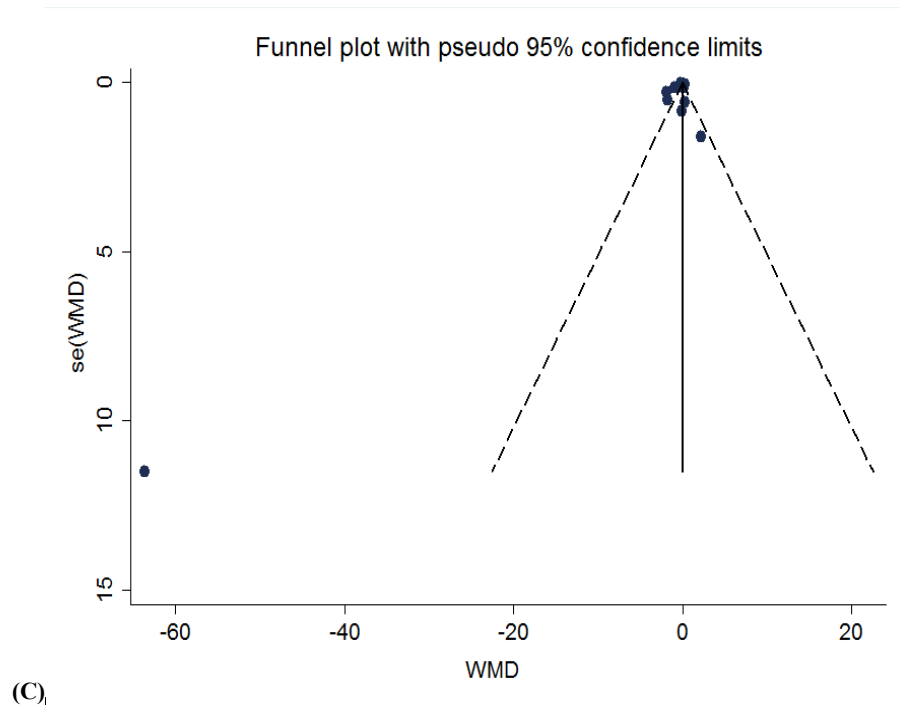

**Figure E1.** Begg's funnel plot (with pseudo 95% CIs) of the WMD versus the se (WMD) for studies evaluating the association between ALA supplementation and (A) CRP (B) IL-6 and (C) TNF- $\alpha$  concentrations.

## References

1. Moher, D., Liberati, A., Tetzlaff, J., Altman, D.G. (2009) Preferred reporting items for systematic reviews and meta-analyses: the PRISMA statement. *Annals of internal medicine*. 151(4): 264-269.
2. Mendoza-Núñez, V.M., García-Martínez, B.I., Rosado-Pérez, J., Santiago-Osorio, E., Pedraza-Chaverri, J., Hernández-Abad, V.J. (2019) The effect of 600 mg alpha-lipoic acid supplementation on oxidative stress, inflammation, and RAGE in older adults with type 2 diabetes mellitus. *Oxidative medicine and cellular longevity*. 2019.
3. Sardu, C., Santulli, G., Santamaria, M., Barbieri, M., Sacra, C., Paolisso, P., D'amico, F., Testa, N., Caporaso, I., Paolisso, G. (2017) Effects of alpha lipoic acid on multiple cytokines and biomarkers and recurrence of atrial fibrillation within 1 year of catheter ablation. *The American journal of cardiology*. 119(9): 1382-1386.
4. Hong, Y., Peng, J., Cai, X., Zhang, X., Liao, Y., Lan, L. (2017) Clinical efficacy of alprostadil combined with  $\alpha$ -lipoic acid in the treatment of elderly patients with diabetic nephropathy. *Open Medicine*. 12(1): 323-327.
5. Usta Atmaca, H., Akbas, F. (2017) THE EFFECT OF SHORT TERM ALPHA LIPOIC ACID ADMINISTRATION ON ADIPONECTIN AND BODY WEIGHT IN TYPE 2 DIABETES MELLITUS PATIENTS. *Acta Endocrinol (Buchar)*. 13(4): 461-466.
6. Marfella, R., Barbieri, M., Sardu, C., Rizzo, M.R., Siniscalchi, M., Paolisso, P., Ambrosino, M., Fava, I., Materazzi, C., Cinquegrana, G. (2016) Effects of  $\alpha$ -lipoic acid therapy on sympathetic heart innervation in patients with previous experience of transient takotsubo cardiomyopathy. *Journal of cardiology*. 67(2): 153-161.
7. Mohammadi, V., Khorvash, F., Feizi, A., Askari, G. (2017) The effect of alpha-lipoic acid supplementation on anthropometric indices and food intake in patients who experienced stroke: A randomized, double-blind, placebo-controlled clinical trial. *J Res Med Sci*. 22: 98.
8. Mirtaheri, E., Pourghassem Gargari, B., Kolahi, S., Dehghan, P., Asghari-Jafarabadi, M., Hajalilou, M., Shakiba Novin, Z., Mesgari Abbasi, M. (2015) Effects of alpha-lipoic acid supplementation on inflammatory biomarkers and matrix Metalloproteinase-3 in rheumatoid arthritis patients. *Journal of the American College of Nutrition*. 34(4): 310-317.
9. Huerta, A.E., Prieto-Hontoria, P.L., Sáinz, N., Martínez, J.A., Moreno-Aliaga, M.J. (2015) Supplementation with  $\alpha$ -lipoic acid alone or in combination with eicosapentaenoic acid modulates the inflammatory status of healthy overweight or obese women consuming an energy-restricted diet. *The Journal of nutrition*. 146(4): 889S-896S.
10. Dworacka, M., Iskakova, S., Krzyżagórska, E., Wesołowska, A., Kurmambayev, Y., Dworacki, G. (2015) Alpha-lipoic acid modifies circulating angiogenic factors in patients with type 2 diabetes mellitus. *Diabetes research and clinical practice*. 107(2): 273-279.
11. Safa, J., Ardalan, M.R., Rezazadehsaatlou, M., Mesgari, M., Mahdavi, R., Jadid, M.P. (2014) Effects of alpha lipoic acid supplementation on serum levels of IL-8 and TNF- $\alpha$  in patient with ESRD undergoing hemodialysis. *International urology and nephrology*. 46(8): 1633-1638.
12. Khalili, M., Azimi, A., Izadi, V., Eghtesadi, S., Mirshafiey, A., Sahraian, M.A., Motevalian, A., Norouzi, A., Sanoobar, M., Eskandari, G. (2014) Does lipoic acid consumption affect the cytokine profile in multiple sclerosis patients: a double-blind, placebo-controlled, randomized clinical trial. *Neuroimmunomodulation*. 21(6): 291-296.
13. Manning, P., Sutherland, W., Williams, S., Walker, R., Berry, E., De Jong, S., Ryalls, A. (2013) The effect of lipoic acid and vitamin E therapies in individuals with the metabolic syndrome. *Nutrition, Metabolism and Cardiovascular Diseases*. 23(6): 543-549.
14. El-Nakib, G.A., Mostafa, T.M., Abbas, T.M., El-Shishtawy, M.M., Mabrouk, M.M., Sobh, M.A. (2013) Role of alpha-lipoic acid in the management of anemia in patients with chronic renal failure undergoing hemodialysis. *International journal of nephrology and renovascular disease*. 6: 161.
15. Ahmadi, A., Mazooji, N., Roozbeh, J., Mazloom, Z., Hasanzade, J. (2013) Effect of alpha-lipoic acid and vitamin E supplementation on oxidative stress, inflammation, and malnutrition in hemodialysis patients. *Iranian Journal of Kidney Diseases*. 7(6): 461-467.
16. Mollo, R., Zaccardi, F., Scalone, G., Scavone, G., Rizzo, P., Navarese, E.P., Manto, A., Pitocco, D., Lanza, G.A., Ghirlanda, G. (2012) Effect of  $\alpha$ -lipoic acid on platelet reactivity in type 1 diabetic patients. *Diabetes Care*. 35(2): 196-197.

17. Khabbazi, T., Mahdavi, R., Safa, J., Pour-Abdollahi, P. (2012) Effects of alpha-lipoic acid supplementation on inflammation, oxidative stress, and serum lipid profile levels in patients with end-stage renal disease on hemodialysis. *Journal of renal nutrition*. 22(2): 244-250.
18. Zhang, Y., Han, P., Wu, N., He, B., Lu, Y., Li, S., Liu, Y., Zhao, S., Liu, L., Li, Y. (2011) Amelioration of lipid abnormalities by alpha-lipoic acid through antioxidative and anti-inflammatory effects. *Obesity (Silver Spring)*. 19(8): 1647-53.
19. Gianturco, V., Bellomo, A., D'ottavio, E., Formosa, V., Iori, A., Mancinella, M., Troisi, G., Marigliano, V. (2009) Impact of therapy with  $\alpha$ -lipoic acid (ALA) on the oxidative stress in the controlled NIDDM: a possible preventive way against the organ dysfunction? *Archives of gerontology and geriatrics*. 49: 129-133.
20. Bae, S.-C., Jung, W.-J., Lee, E.-J., Yu, R., Sung, M.-K. (2009) Effects of antioxidant supplements intervention on the level of plasma inflammatory molecules and disease severity of rheumatoid arthritis patients. *Journal of the American College of Nutrition*. 28(1): 56-62.
21. Xiang, G.D., Sun, H.L., Zhao, L.S., Hou, J., Yue, L., Xu, L. (2008) The antioxidant alpha-lipoic acid improves endothelial dysfunction induced by acute hyperglycaemia during OGTT in impaired glucose tolerance. *Clinical endocrinology*. 68(5): 716-723.
22. Vincent, H.K., Bourguignon, C.M., Vincent, K.R., Taylor, A.G. (2007) Effects of alpha-lipoic acid supplementation in peripheral arterial disease: a pilot study. *The Journal of Alternative and Complementary Medicine*. 13(5): 577-584.
23. Chang, J.W., Lee, E.K., Kim, T.H., Min, W.K., Chun, S., Lee, K.-U., Kim, S.B., Park, J.S. (2007) Effects of  $\alpha$ -lipoic acid on the plasma levels of asymmetric dimethylarginine in diabetic end-stage renal disease patients on hemodialysis: a pilot study. *American journal of nephrology*. 27(1): 70-74.
24. Alleva, R., Nasole, E., Di Donato, F., Borghi, B., Neuzil, J., Tomasetti, M. (2005)  $\alpha$ -Lipoic acid supplementation inhibits oxidative damage, accelerating chronic wound healing in patients undergoing hyperbaric oxygen therapy. *Biochemical and Biophysical Research Communications*. 333(2): 404-410.
